# Supplementary material for: Evaluation of SeptiCyte RAPID, a host immune response assay, for triage of COVID-19 patients requiring hospitalization and potential ICU care
Source: Research Square preprint supplement (doi:10.21203/rs.3.rs-1942658/v1), 2022-10-03
Supplement: Supplementary file 1 [file 8289e3914d1410980a8d8e23.docx]

**Evaluation of SeptiCyte RAPID, a host immune response asssay, for triage of COVID-19 patients requiring hospitalization and potential ICU care**

Maria Milagro Montero2,4, Max Hardy-Werbin1,2, Soledad Gonzalez Gallardo2, Erica Torres3, Rebeca Rueda3, Irene Hannet5, James T Kirk5, Thomas D Yager5, Krupa Navalkar5, Maria del Mar Arenas2,4, Itziar Arietta-Aldea2,4, Silvia Castañeda2,4, Joan Gómez-Junyent2,4, Silvia Gómez-Zorrilla2,4, Roberto Guerri-Fernández2,4, Francisca Sanchez-Martinez2,4, Immaculada López-Montesinos2,4, Ivan Pelegrín2,4, Elena Sendra2,4, Luisa Sorlí2,4, Judith Villar-García2,4, Beatriz Bellosillo Paricio 2,3*§,Juan Pablo Horcajada2,4*

1 Emergency Department, Hospital del Mar, Barcelona (Spain)

2 Research Institute, Hospital del Mar, Barcelona (Spain)

3 Pathology Department, Hospital del Mar, Barcelona (Spain)

4 Infectious Disease Department, Hospital del Mar, Barcelona (Spain)

5 Immunexpress - Seattle (United States)

* shared senior authorship

§ corresponding author. Email address: [94161@parcdesalutmar.cat](mailto:94161@parcdesalutmar.cat" \t "_blank)

**Supplementary Tables**

**Supplementary Table 1**  **Clinical data capture (from Case Report Form)**

| Demographics (age, sex, ethnicity/race) |
| --- |
| SARS-CoV-2 testing results (confirmed SARS-CoV-2 positive status by RT-qPCR or antigen test) |
| Clinical variables and medical historya |
| Vital signsb (values collected in the first 24 hours after hospital admission) |
| Laboratory variablesc (values collected in the first 24 hours after hospital admission, unless noted otherwise) |
| Microbiology tests (during hospital stay) (Performed yes/no; findings) |
| Serology tests (during hospital stay) (Performed yes/no; findings) |
| CBC w/differential (WBC, lymphocytes, neutrophils, platelets, bands), during hospital stay |
| Other viral tests, during hospital stay (Performed yes/no; findings) |
| Radiologic evaluation/imaging results |
| Hospital (and ICU) length of stay |
| Therapeutic treatments/interventions (antivirals, antibacterials, corticosteroids, vasopressors, inotropes, supplemental O2, mechanical ventilation, ECMO, RRT/dialysis) |
| Final diagnosis as per care team |
| Mortality data |
| a Presence of chronic infection, presence and description of comorbidities, presence of immunosuppression.  b Temperature, respiratory rate, heart rate, mean arterial pressure, systolic blood pressure (highest, lowest)  c CRP, D-dimer, IL6, lactate, procalcitonin, oxygen saturation (within the first 72 hours). |

**Supplementary Table 2 Clinical interventions provided to the patients stratified by COVID severity.** Numbers in parentheses ( ) are percentages.

| **Interventions** | **Mild** | **Moderate** | **Severe** | **Critical** | **Critical & Died** |
| --- | --- | --- | --- | --- | --- |
| **(n=10)** | **(n=27)** | **(n=70)** | **(n=39)** | **(n=13)** |
| Antivirals | 0 | 2 (7.4) | 19 (27) | 12 (31) | 4 (31) |
| Antibacterials | 4 (40) | 8 (30) | 34 (49) | 34 (87) | 11 (85) |
| Steroids | 3 (30) | 20 (74) | 70 (100) | 39 (100) | 13 (100) |
| Vasopressors | 0 | 0 | 1 (1.4) | 18 (46) | 8 (62) |
| Inotropes | 0 | 0 | 3 (4.3) | 19 (49) | 10 (77) |
| Low flow O2 | 4 (40) | 16 (59) | 67 (96) | 33 (85) | 7 (54) |
| High flow O2 | 0 | 2 (7.4) | 40 (57) | 39 (100) | 13 (100) |
| Mechanical ventilation (MV) | 0 | 1 (3.7) | 0 | 17 (44) | 5 (38) |
| MV + intubation | 0 | 0 | 0 | 18 (46) | 9 (69) |
| ECMO | 0 | 0 | 0 | 1 (2.6) | 1 (7.7) |
| RRT / dialysis | 2 (20) | 0 | 1 (1.4) | 4 (10) | 3 (23) |
| ICU admission | 0 | 0 | 9 (13) | 31 (79) | 9 (69) |
| Death | 0 | 0 | 0 | 13 (33) | 13 (100) |

**Supplementary Table 3**  **Quantitative variables defining the eigenvectors used in the Principal Component Analysis.** The R package FactoMinerR [Le et al., 2008] was used.

| **No.** | **Quantitative variables used to construct the PCA** |
| --- | --- |
| 1 | SeptiCyte.Score |
| 2 | Temperature_max |
| 3 | Heart_Rate_min |
| 4 | AP_min_Systolic |
| 5 | Percent lymphocytes |
| 6 | Percent neutrophils |
| 7 | neutrophils_lymphocytes_ratio |
| 8 | high_flow_O2_total_days_event1 |
| 9 | high_flow_O2_total_days_event1+2 - combining the number of days a patient was on high flow oxygen during event 1 and event 2 |
| 10 | mechanical_ventilation_total_days_event_1+2 - combining the number of days a patient was on mechanical ventilation during event 1 and event 2 |
| 11 | Creatinine |
| 12 | Procalcitonin (PCT) |
| 13 | Systolic_Blood_Pressure_max |
| 14 | O2_saturation_first_72_hours_min |
| 15 | MAP_min |
| 16 | WBC.count |
| 17 | HA_lowO2_event1_start |
| 18 | Age |
| 19 | Temperature_min |
| 20 | Arterial Pressure_max_Systolic |
| 21 | Arterial Pressure_min_Diastolic |
| 22 | low_flow_O2_total_days_event1 |
| 23 | high_flow_O2_total_days_event2 |
| 24 | low_flow_O2_total_days_event1+2 - combining the number of days a patient was on low flow oxygenation during events 1 and 2 |
| 25 | intubation_with_MV_total_days_event_1_2 - combining the number of days a patient was on intubation with mechanical ventilation during events 1 and 2 of the intervention. |
| 26 | Lactate |
| 27 | Respiratory_Rate_max |
| 28 | Systolic_Blood_Pressure_min |
| 29 | D.dimer |
| 30 | Platelets |
| 31 | HA_highO2_event1_start |
| 32 | Hospital_total_stay_days |
| 33 | Heart_Rate_max |
| 34 | Arterial Pressure_max_Diastolic |
| 35 | low_flow_O2_total_days_event2 |
| 36 | PAXgene_collection_from_hospital_admission_days |
| 37 | high_flow_O2_total_days_event 1+2+3+4+5 (combining the number of days a patient was on high flow oxygen, during all separate intervals of O2 administration |
| 38 | IL-6 |
| 39 | C-reactive protein (CRP) |
| 40 | Respiratory_Rate_min |
| 41 | O2_saturation_first_72_hours_max |
| 42 | MAP_max |
| 43 | cells_percent_sum |
| 44 | SpO2/FiO2 ratio calculated for the partial SOFA score |
| 45 | total_days_on_O2_therapy - combining total number of days on either high or low flow oxygenation |
